# Supplementary material
Source: Springer Nature journal article supplement (https://www.springermedizin.de/resource/supplementary/13058_2011_2848_MOESM15_ESM.pdf/9702724)

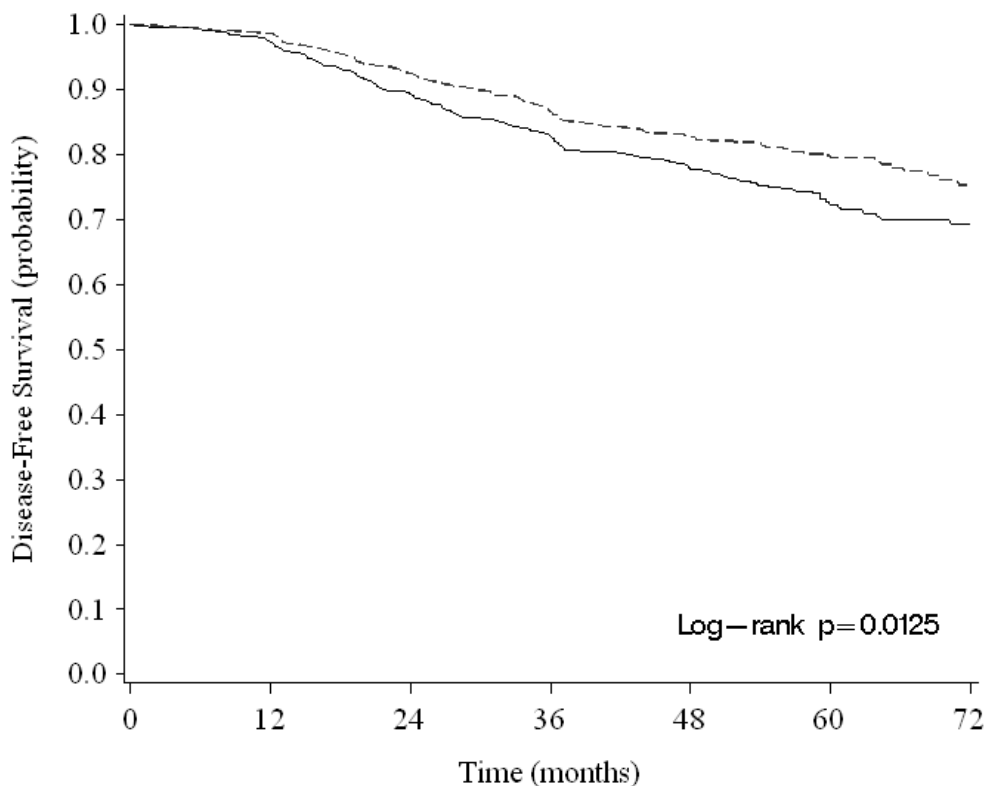

No at risk

|       |       |     |     |     |     |     |     |    |
|-------|-------|-----|-----|-----|-----|-----|-----|----|
| FEC   | —     | 546 | 530 | 479 | 442 | 410 | 221 | 80 |
| FEC-D | ..... | 553 | 546 | 510 | 474 | 440 | 274 | 76 |

Supplement: MOESM15 [file 9702724]
